# Supplementary material for: Stepwise assembly of heterobimetallic complexes: synthesis, structure, and physical properties
Source: Royal Society of Chemistry journal article supplement (doi:10.1039/d1dt01021b), 2021-01-01
Supplement: d1dt01021b1.pdf [file d1dt01021b1.pdf]

## Supporting Information

### Stepwise Assembly of Heterobimetallic Complexes: Synthesis, Structure, and Physical Properties.

Justin L. Lee,<sup>a</sup> Victoria F. Oswald,<sup>a</sup> Saborni Biswas,<sup>b</sup> Ethan A. Hill,<sup>a</sup> Joseph W. Ziller,<sup>a</sup> Michael P. Hendrich<sup>b</sup> and A. S. Borovik<sup>\*a</sup>

<sup>a</sup>Department of Chemistry, University of California, Irvine, 1102 Natural Sciences II, California 92697, United States

<sup>b</sup>Department of Chemistry, Carnegie Mellon University, 4400 Fifth Avenue, Pittsburgh, Pennsylvania 15213, United States

\*Email: aborovik@uci.edu

#### Contents

|                                        |    |
|----------------------------------------|----|
| Crystallography.....                   | S2 |
| Data Analysis of EPR measurements..... | S4 |
| Table S1.....                          | S5 |
| Table S2.....                          | S6 |
| Figure S1.....                         | S7 |
| Figure S2.....                         | S7 |
| Figure S3.....                         | S8 |
| References.....                        | S8 |

## Crystallography

**Structure of  $\{K[Fe^{III}poat(OH)]\}_2$ .** An orange crystal of approximate dimensions 0.293 x 0.313 x 0.363 mm was mounted in a cryoloop and transferred to a Bruker SMART APEX II diffractometer system. The APEX2<sup>1</sup> program package was used to determine the unit-cell parameters and for data collection (20 sec/frame scan time for a sphere of diffraction data). The raw frame data was processed using SAINT<sup>2</sup> and SADABS<sup>3</sup> to yield the reflection data file. Subsequent calculations were carried out using the SHELXTL<sup>4</sup> program package. The diffraction symmetry was  $2/m$  and the systematic absences were consistent with the monoclinic space group  $P2_1/c$  that was later determined to be correct. The structure was solved by direct methods and refined on  $F^2$  by full-matrix least-squares techniques. The analytical scattering factors<sup>5</sup> for neutral atoms were used throughout the analysis. Hydrogen atom H(1) was located from a difference-Fourier map and refined ( $x,y,z$  and  $U_{iso}$ ) with  $d(O-H) = 0.85\text{\AA}$ . The remaining hydrogen atoms were included using a riding model. The molecule was located about an inversion center. Least-squares analysis yielded  $wR2 = 0.0813$  and  $Goof = 1.063$  for 499 variables refined against 10756 data ( $0.73\text{\AA}$ ),  $R1 = 0.0294$  for those 9510 data with  $I > 2.0\sigma(I)$ .

There were several high residuals present in the final difference-Fourier map. It was not possible to determine the nature of the residuals although it was probable that diethylether solvent was present. The SQUEEZE<sup>6a</sup> routine in the PLATON<sup>6b</sup> program package was used to account for the electrons in the solvent accessible voids.

**Structure of  $[(TMTACN)Zn^{II}-(\mu-OH)-Fe^{III}poat]OTf$ .** A yellow crystal of approximate dimensions 0.247 x 0.208 x 0.152 mm was mounted in a cryoloop and transferred to a Bruker SMART APEX II diffractometer. The APEX2<sup>1</sup> program package was used to determine the unit-cell parameters and for data collection (30 sec/frame scan time for a sphere of diffraction data). The raw frame data was processed using SAINT<sup>2</sup> and SADABS<sup>3</sup> to yield the reflection data file. Subsequent calculations were carried out using the SHELXTL<sup>4</sup> program. There were no systematic absences nor any diffraction symmetry other than the Friedel condition. The centrosymmetric triclinic space group  $P\bar{1}$  was assigned and later determined to be correct. The structure was solved by direct methods and refined on  $F^2$  by full-matrix least-squares techniques. The analytical scattering factors<sup>5</sup> for neutral atoms were used throughout the analysis. The hydroxide hydrogen atoms (H1 and H8) were located from a difference-Fourier map and refined ( $x,y,z$  and  $U_{iso}$ ). The remaining hydrogen atoms were included using a riding model. There were two molecules of the formula-unit present ( $Z = 4$ ). Disordered atoms were included as isotropic atoms using multiple components with partial site-occupancy factors.

Least-squares analysis yielded  $wR2 = 0.1138$  and  $Goof = 1.016$  for 1341 variables refined against 32345 data ( $0.70\text{\AA}$ ),  $R1 = 0.0504$  for those 24496 data with  $I > 2.0\sigma(I)$ .

**Structure of  $[(TMTACN)Cu^{II}-(\mu-OH)-Fe^{III}poat]OTf$ .** A yellow crystal of approximate dimensions 0.276 x 0.189 x 0.131 mm was mounted in a cryoloop and transferred to a Bruker SMART APEX II diffractometer. The APEX2<sup>1</sup> program package was used to determine the unit-cell parameters and for data collection (90 sec/frame scan time for a sphere of diffraction data). The raw

frame data was processed using SAINT<sup>2</sup> and SADABS<sup>3</sup> to yield the reflection data file. Subsequent calculations were carried out using the SHELXTL<sup>4</sup> program. There were no systematic absences nor any diffraction symmetry other than the Friedel condition. The centrosymmetric triclinic space group  $P\bar{1}$  was assigned and later determined to be correct. The structure was solved by direct methods and refined on  $F^2$  by full-matrix least-squares techniques. The analytical scattering factors<sup>5</sup> for neutral atoms were used throughout the analysis. The hydroxide hydrogen atoms (H1 and H8) were located from a difference-Fourier map and refined ( $x,y,z$  and  $U_{iso}$ ). The remaining hydrogen atoms were included using a riding model. There were two molecules of the formula-unit present ( $Z = 4$ ). Disordered atoms were included as isotropic atoms using multiple components with partial site-occupancy factors.

Least-squares analysis yielded  $wR2 = 0.0899$  and  $Goof = 1.026$  for 1396 variables refined against 31356 data (0.70 Å),  $R1 = 0.0355$  for those 25498 data with  $I > 2.0\sigma(I)$ .

**Structure of [(TMTACN)Ni<sup>II</sup>-( $\mu$ -OH)-Fe<sup>III</sup>poat]OTf.** An orange crystal of approximate dimensions 0.258 x 0.099 x 0.086 mm was mounted in a cryoloop and transferred to a Bruker SMART APEX II diffractometer. The APEX2<sup>1</sup> program package was used to determine the unit-cell parameters and for data collection (180 sec/frame scan time for a sphere of diffraction data). The raw frame data was processed using SAINT<sup>2</sup> and SADABS<sup>3</sup> to yield the reflection data file. Subsequent calculations were carried out using the SHELXTL<sup>4</sup> program. The diffraction symmetry was  $mmm$  and the systematic absences were consistent with the orthorhombic space groups  $Pbcm$  and  $Pca2_1$ . It was later determined that space group  $Pca2_1$  was correct. The structure was solved by direct methods and refined on  $F^2$  by full-matrix least-squares techniques. The analytical scattering factors<sup>5</sup> for neutral atoms were used throughout the analysis. The hydroxide hydrogen atoms (H1 and H8) were located from a difference-Fourier map and refined ( $x,y,z$  and  $U_{iso}$ ) with fixed length. The remaining hydrogen atoms were included using a riding model. There were two molecules of the formula-unit present ( $Z = 4$ ). Disordered atoms were included as isotropic atoms using multiple components with partial site-occupancy factors.

Least-squares analysis yielded  $wR2 = 0.0988$  and  $Goof = 1.010$  for 1356 variables refined against 27950 data (0.74 Å),  $R1 = 0.0532$  for those 21063 data with  $I > 2.0\sigma(I)$ . The structure was refined as a two-component twin. The absolute structure was assigned by refinement of the Flack<sup>7</sup> parameter.

## Data Analysis of EPR Measurements

The simulation software *SpinCount* diagonalizes the electronic terms of the spin Hamiltonian

$$H = J\mathbf{S}_1 \cdot \mathbf{S}_2 + H_1 + H_2 \quad (1)$$

with

$$H_i = \beta \mathbf{S}_i \cdot \mathbf{g}_i \cdot \mathbf{B} + \mathbf{S}_i \cdot \mathbf{D}_i \cdot \mathbf{S}_i \quad i = 1, 2$$

and

$$\mathbf{S}_i \cdot \mathbf{D}_i \cdot \mathbf{S}_i = D_i[\mathbf{S}_{xi}^2 - \mathbf{S}_i(\mathbf{S}_i + 1)/3 + (E/D)_i(\mathbf{S}_{xi}^2 - \mathbf{S}_{yi}^2)] \quad i = 1, 2$$

where the parameters have the usual definitions,<sup>8</sup> and performs least-squares fitting of simulations to the spectra. The spin  $\mathbf{S}_i$  refers to individual Fe<sup>III</sup> ( $S = 5/2$ ) or M<sup>II</sup> sites depending on the M<sup>II</sup> ion incorporated into the complex.  $\mathbf{D}_i$  is assumed coaxial with  $\mathbf{g}_i$  unless specified.<sup>9</sup>

**Table S1.** Crystallographic data for  $K[Fe^{III}poat(OH)]$  and  $[(TMTACN)M^{II}-(\mu-OH)-Fe^{III}poat]OTf$  complexes ( $M^{II} = Zn, Cu, Ni$ )

|                                      | $\{K[Fe^{III}poat(OH)]\}_2$    | $[(TMTACN)Zn^{II}-(\mu-OH)-Fe^{III}poat]OTf$ | $[(TMTACN)Cu^{II}-(\mu-OH)-Fe^{III}poat]OTf$ | $[(TMTACN)Ni^{II}-(\mu-OH)-Fe^{III}poat]OTf$ |
|--------------------------------------|--------------------------------|----------------------------------------------|----------------------------------------------|----------------------------------------------|
| Formula                              | $C_{84}H_{86}Fe_2K_2N_8O_8P_6$ | $C_{52}H_{64}F_3FeN_7O_7P_3S$                | $C_{52}H_{64}CuF_3FeN_7O_7P_3S$              | $C_{52}H_{64}F_3FeN_7NiO_7P_3S$              |
| fw                                   | 1711.32                        | 1202.29                                      | 1200.46                                      | 1195.63                                      |
| T (K)                                | 88(2)                          | 88(2)                                        | 133(2)                                       | 93(2)                                        |
| Crystal system                       | Monoclinic                     | Triclinic                                    | Triclinic                                    | Orthorhombic                                 |
| Space group                          | $P2_1/c$                       | $P\bar{1}$                                   | $P\bar{1}$                                   | $Pca2_1$                                     |
| a (Å)                                | 15.8093(12)                    | 14.8745(7)                                   | 14.8537(13)                                  | 21.3910(9)                                   |
| b (Å)                                | 14.4288(11)                    | 17.1815(8)                                   | 17.1335(15)                                  | 17.3399(8)                                   |
| c (Å)                                | 19.8831(15)                    | 21.4499(10)                                  | 21.4044(19)                                  | 29.1742(13)                                  |
| $\alpha$ (°)                         | 90                             | 89.3968(8)                                   | 90.9050(15)                                  | 90                                           |
| $\beta$ (°)                          | 111.1598(9)                    | 89.9334(8)                                   | 91.3032(14)                                  | 90                                           |
| $\gamma$ (°)                         | 90                             | 81.8418(8)                                   | 98.1532(14)                                  | 90                                           |
| Z                                    | 2                              | 4                                            | 4                                            | 8                                            |
| V (Å <sup>3</sup> )                  | 4229.7(6)                      | 5426.1(4)                                    | 5389.9(8)                                    | 10821.2(8)                                   |
| $\delta_{calc}$ (mg/m <sup>3</sup> ) | 1.344                          | 1.472                                        | 1.479                                        | 1.468                                        |
| Independent reflections              | 10756                          | 32345                                        | 31356                                        | 27950                                        |
| R1                                   | 0.0294                         | 0.0504                                       | 0.0355                                       | 0.0532                                       |
| wR2                                  | 0.0813                         | 0.1138                                       | 0.0899                                       | 0.0988                                       |
| Goof                                 | 1.063                          | 1.016                                        | 1.026                                        | 1.010                                        |
| CCDC#                                | 2072600                        | 2072601                                      | 2072602                                      | 2072603                                      |

$$wR2 = [\Sigma[w(F_o^2 - F_c^2)^2] / \Sigma[w(F_o^2)]]^{1/2}$$

$$R1 = \Sigma ||F_o| - |F_c|| / \Sigma |F_o|$$

Goof =  $S = [\Sigma[w(F_o^2 - F_c^2)^2] / (n-p)]^{1/2}$  where n is the number of reflections and p is the total number of parameters refined.

The thermal ellipsoid plot is shown at the 50% probability level.

**Table S2.** Selected Metrical Parameters for  $\{\text{K}[\text{Fe}^{\text{III}}\text{poat}(\text{OH})]\}_2$ .

|                               | Bond Lengths (Å) |
|-------------------------------|------------------|
| Fe1–N1                        | 2.373(1)         |
| Fe1–N2                        | 2.026(1)         |
| Fe1–N3                        | 2.004(1)         |
| Fe1–N4                        | 2.003(1)         |
| Fe1–O1                        | 1.896(1)         |
| K1–O1                         | 2.759(1)         |
| K1–O2                         | 2.665(1)         |
| K1'–O1                        | 2.870(1)         |
| K1'–O3                        | 2.656(1)         |
| K1'–O4                        | 2.655(1)         |
| $d[\text{Fe1–N}_{\text{eq}}]$ | 0.425            |
|                               | Angles (°)       |
| O1–Fe1–N1                     | 175.84(4)        |
| N2–Fe1–N3                     | 114.67(5)        |
| N3–Fe1–N4                     | 113.33(4)        |
| N2–Fe1–N4                     | 118.96(5)        |
| Fe1–O1–K1                     | 135.95(5)        |
| Fe1–O1–K1'                    | 121.22(4)        |
| $\tau_5^a$                    | 0.948            |

<sup>a</sup>Trigonality structural parameter,  $\tau_5 = (\beta - a)/60^\circ$ .  $\beta$  is the largest bond angle observed, and  $a$  is the second largest bond angle observed.

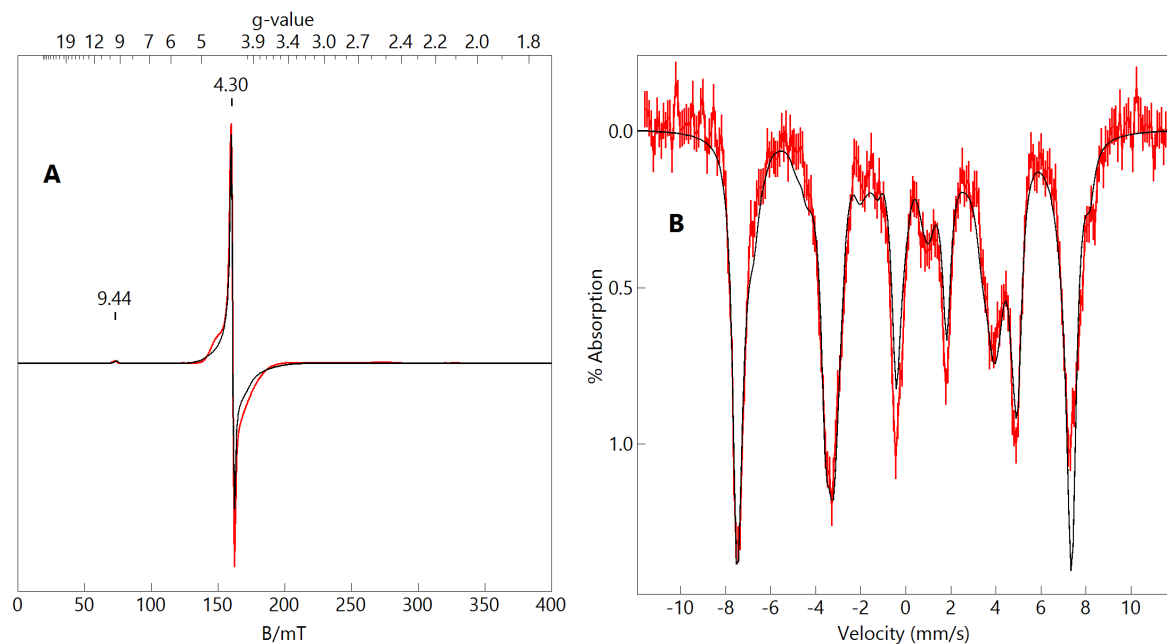

**Figure S1.** EPR (A) and Mössbauer (B) spectra of 1.6mM (K18c6)[ $^{57}\text{Fe}^{\text{III}}\text{poat}(\text{OH})$ ] in 1:1 DMF:THF (red plots). Experimental parameters: (A) microwaves, 0.2 mW at 9.645 GHz; temperature, 12 K; (B) magnetic field 45 mT parallel to  $\gamma$ -ray direction, temperature, 4.2 K. The black lines are simulation for:  $S = 5/2$ ,  $D = 1 \text{ cm}^{-1}$ ,  $E/D = 0.27$ ,  $A_{\text{Fe}} = (-20, -19, -19) \text{ T}$ ,  $\delta = 0.32 \text{ mm/s}$ ,  $\Delta E_{\text{Q}} = 0.92 \text{ mm/s}$ ,  $\eta = 0.9$ .

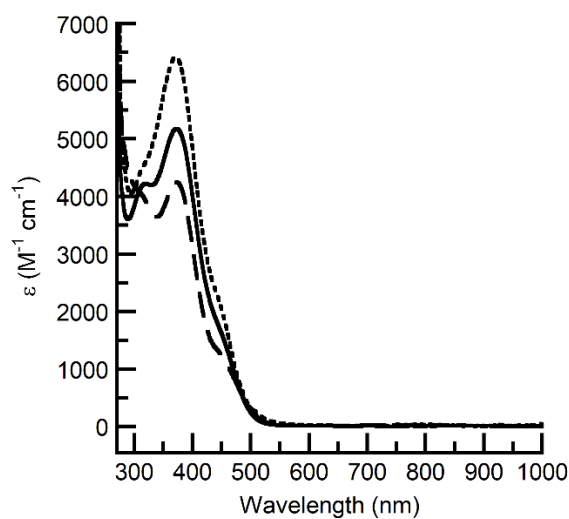

**Figure S2.** Full electronic absorbance spectra for (A)  $[\text{Zn}^{\text{II}}(\text{OH})\text{Fe}^{\text{III}}]^+$  (black solid line), (B)  $[\text{Cu}^{\text{II}}(\text{OH})\text{Fe}^{\text{III}}]^+$  (black dashed line), and (C)  $[\text{Ni}^{\text{II}}(\text{OH})\text{Fe}^{\text{III}}]^+$  (black dotted line) complexes. Absorbance measurements were performed on a 0.10 mM  $\text{CH}_2\text{Cl}_2$  solution at room temperature.

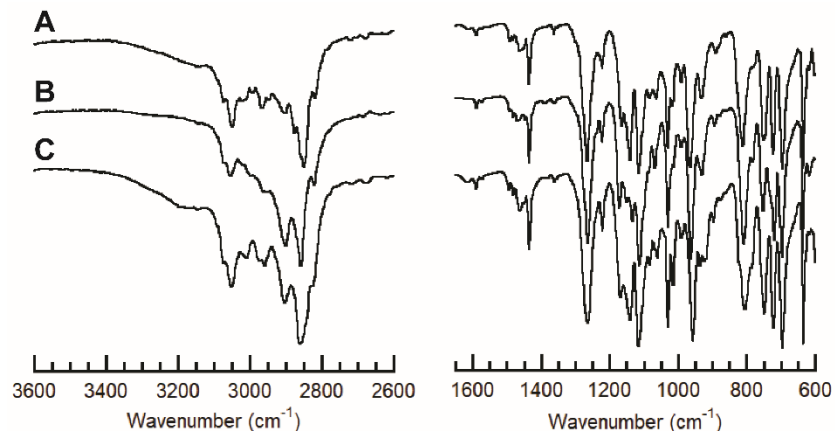

**Figure S3.** FTIR spectra for  $[\text{Zn}^{\text{II}}(\text{OH})\text{Fe}^{\text{III}}]^+$  (A),  $[\text{Cu}^{\text{II}}(\text{OH})\text{Fe}^{\text{III}}]^+$  (B), and  $[\text{Ni}^{\text{II}}(\text{OH})\text{Fe}^{\text{III}}]^+$  (C).

## References

1. APEX2 Version 2014.11-0, Bruker AXS, Inc.; Madison, WI 2014.
2. SAINT Version 8.34a, Bruker AXS, Inc.; Madison, WI 2013.
3. Sheldrick, G. M. SADABS, Version 2014/5, Bruker AXS, Inc.; Madison, WI 2014.
4. Sheldrick, G. M. SHELXTL, Version 2014/7, Bruker AXS, Inc.; Madison, WI 2014.
5. International Tables for Crystallography 1992, Vol. C., Dordrecht: Kluwer Academic Publishers.
6. (a) Spek, A.L. SQUEEZE, *Acta Cryst.* 2015, C71, 9-19., (b) Spek, A. L. PLATON, *Acta. Cryst.* 2009, D65, 148-155
7. Parsons, S., Flack, H. D., Wagner, T. *Acta Cryst.* B69, 249-259, 2013.
8. Abragam, A.; Bleaney, B. *Electron Paramagnetic Resonance of Transition Metal Ions*; Clarendon Press: Oxford, U.K., 1970.
9. Brink, D. M.; Satchler, G. R. *Angular momentum*, 3rd ed.; Clarendon Press: Oxford, U.K., 1994.
